# Supplementary material
Source: PubMed Central journal article supplement (PMC9435990)
Supplement: CJN.03160322-SupplementaryData1.pdf [file CJN.03160322-SupplementaryData1.pdf]

## **Supplemental Material**

**Training program of the EXCITE trial and Supplemental Table 1** (Schematic description of the home-based training program prescribed according to the patient's functioning level )

**Supplemental Figure 1** CONSORT diagram of the EXCITE trial

**Supplemental Table 2** comparison of patients who exited from the 6th month trial before the 6th month (n=47) and those (n=104, completers) who completed the 6 months trial.

**Supplemental Table 3** Breakdown of patients who had a high adherence (>60%) to the prescribed exercise sessions during the 6-month trial and those who had a low adherence (<60%).

**Supplemental Table 4** Multivariate COX regression analysis for the risk of hospitalization (N=126) and Multivariate Cox's regression analysis by adherence to the exercise program for the risk of hospitalization.

**TRAINING PROGRAM TESTED IN THE EXCITE TRIAL** (ref. 15) Patients were instructed to perform two 10 min walking sessions during the day off dialysis at pre-fixed cadence (steps/minute) [15]. The initial cadence and the walk:rest ratio was established on the basis of the distance (meters) covered during the baseline six-minutes walking test (6MWT) and such a cadence was weekly increased up to the 14th week. From the 14th week on, the resting time within the session was reduced, with the cadence that was properly adjusted (see ref. [15] and **supplemental TABLE 1**). To maintain the established cadence, patients in the active arm of the trial were provided with of a low cost metronome (Seiko DM50, Seiko LTD, Japan). Adherence to physical exercise program was pre-specified as adherence to >60% exercise sessions (high adherence) during the first 6-months of the trial [15]. **Supplemental Table 1** Schematic description of the home-based training program prescribed according to the patient's functioning level (from Ref 15).

| <b>Functioning Capacity Level</b>                 | Normal       | Moderate     | Low    | Very Low               |
|---------------------------------------------------|--------------|--------------|--------|------------------------|
| <b>6 min distance walked at baseline (meters)</b> | >300 to ≤550 | <300 to >200 | <200   | <200 + severe symptoms |
| <b>Number of training sessions</b>                | 2            | 2            | 2      | 2                      |
| <b>Duration of training sessions (min)</b>        | 10           | 10           | 10     | 10                     |
| <b>Frequency (times/week)</b>                     | 3            | 3            | 3      | 3                      |
| <b><u>Training speed</u></b>                      |              |              |        |                        |
| <b>Baseline (km/h)</b>                            | 2,8          | 2,0          | 1,4    | 1,4                    |
| <b>weeks 1-14 (steps/min)</b>                     | 72-120       | 66-100       | 56-80  | 56-80                  |
| <b>weeks 15-24 (steps/min)</b>                    | 90-120       | 80-100       | 60-80  | 60-80                  |
| <b>weeks 1-14</b>                                 |              |              |        |                        |
| work/rest time (min)                              | 5 : 1        | 5 : 1        | 5 : 1  | 2 : 1                  |
| repetitions (number)                              | 2            | 2            | 2      | 5                      |
| <b>weeks 15-24</b>                                |              |              |        |                        |
| work/rest time (min)                              | 10 : 0       | 10 : 0       | 10 : 0 | 5 : 1                  |
| repetitions (number)                              | 1            | 1            | 1      | 2                      |

**Supplemental Figure 1** CONSORT diagram of the EXCITE trial (from reference 15)

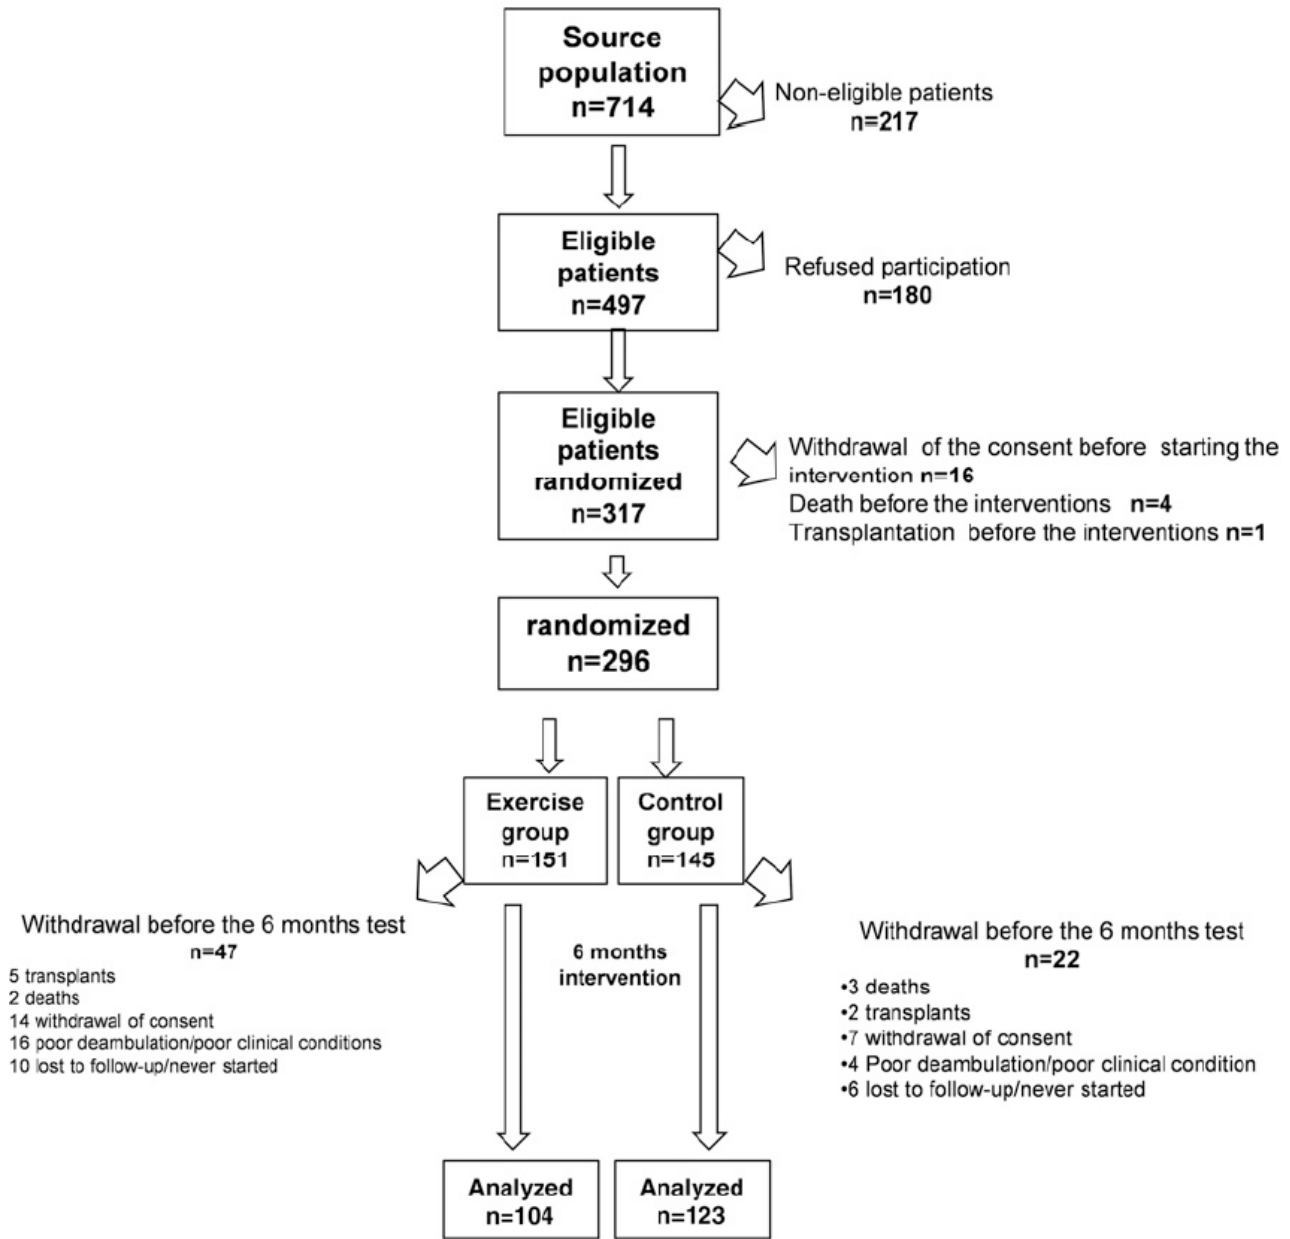

**Supplemental Table 2** : comparison of patients who exited from the EXCITE trial (dropouts) before the 6<sup>th</sup> month (n=47) and those (n=104, completers) who completed the 6 months trial.

|                                      | <b>Dropouts in the active arm (n=47)</b> | <b>Completers in the active arm (n=104)</b> | <b>P</b>    |
|--------------------------------------|------------------------------------------|---------------------------------------------|-------------|
| Age (years)                          | 66±13                                    | 63±13                                       | 0.148       |
| Male gender (%)                      | 37/10                                    | 90/14                                       | 0.419       |
| Hemodialysis / CAPD (n)              | 90/14                                    | 102/21                                      | 0.45        |
| BMI (Kg/m <sup>2</sup> )             | 26±5                                     | 27±6                                        | 0.367       |
| Smoking (0=no; 1=yes)                | 11.9%                                    | 18.4%                                       | 0.344       |
| Diabetes (0=no; 1=yes)               | 31.9%                                    | 18.4%                                       | 0.068       |
| BP Systolic / Diastolic (mmHg)       | 126±17/70±12                             | 132±18/72±10                                | 0.062/0.353 |
| Total Cholesterol (mg/dL)            | 164±28                                   | 164±39                                      | 0.990       |
| Hemoglobin (g/dL)                    | 11.4±1.2                                 | 11.4±1.3                                    | 0.916       |
| Albumin (g/dL)                       | 3.9±0.5                                  | 3.9±0.4                                     | 0.157       |
| Phosphate (mg/dL)                    | 5.1±1.3                                  | 4.9±1.5                                     | 0.480       |
| PTH (pg/mL)                          | 332 (158-418)                            | 280 (179-456)                               | 0.852       |
| CRP (mg/L)                           | 4.0 (1.89-8.3)                           | 5.0 (3.1-9.0)                               | 0.409       |
| Kt/V HD                              | 1.36±0.21                                | 1.42±0.25                                   | 0.197       |
| Kt/V CAPD                            | 2.03±0.26                                | 1.96±0.29                                   | 0.636       |
| Myocardial Infarction (%)            | 12.8%                                    | 15.4%                                       | 0.673       |
| Stroke/Transient Ischemic Attack (%) | 12.8%                                    | 7.7%                                        | 0.320       |
| Anginal Episodes (%)                 | 8.5%                                     | 11.5%                                       | 0.576       |
| Arrhythmia (%)                       | 19.1%                                    | 12.5%                                       | 0.284       |
| Heart Failure (%)                    | 15%                                      | 17%                                         | 0.712       |
| Peripheral Vascular Disease (%)      | 4.3%                                     | 6.7%                                        | 0.552       |
| History of Neoplasia (%)             | 15.2%                                    | 21.8%                                       | 0.354       |
| Anti-hypertensive Therapy (%)        | 73.9%                                    | 76.8%                                       | 0.709       |
| <b>NYHA class</b>                    |                                          |                                             |             |
| I (%)                                | 32%                                      | 38%                                         | 0.527       |
| II (%)                               | 9%                                       | 14%                                         |             |
| III-IV (%)                           | 6%                                       | 4%                                          |             |
| <b>Ambulation</b>                    |                                          |                                             |             |
| Assisted                             | 4.3%                                     | 3.8%                                        | 0.905       |
| Independent                          | 95.7%                                    | 96.2%                                       |             |

**Supplemental TABLE 3**

|                                         | <b>Low adherence (n=49)</b> | <b>High adherence (n=55)</b> | <b>P</b>  |
|-----------------------------------------|-----------------------------|------------------------------|-----------|
| Age (years)                             | 63±13                       | 63±13                        | 0,90      |
| Male gender, N(%)                       | 34 (69%)                    | 33 (60%)                     | 0,32      |
| Hemodialysis / CAPD (n)                 | 43(88%)                     | 47(85%)                      | 0,73      |
| BMI (Kg/m <sup>2</sup> )                | 27±6                        | 26±5                         | 0,51      |
| Smoking, N (0=no; 1=yes)                | 12 (24%)                    | 6 (12%)                      | 0,12      |
| Diabetes, N (0=no; 1=yes)               | 10 (20%)                    | 9 (17%)                      | 0,62      |
| BP Systolic/Diastolic (mmHg)            | 131±19/72±11                | 132±18/72±9                  | 0,73/0,89 |
| Total Cholesterol (mg/dL)               | 150±27                      | 176±44                       | 0,001     |
| Haemoglobin (g/dL)                      | 11,5±1,2                    | 11,4±1,4                     | 0,94      |
| Albumin (g/dL)                          | 3,9±0,4                     | 3,9±0,4                      | 0,54      |
| Phosphate (mg/dL)                       | 4,9±1,6                     | 5±1,4                        | 0,59      |
| Kt/V HD                                 | 1,35±0,28                   | 1,45±0,3                     | 0,14      |
| Kt/V CAPD                               | 1,92±0,18                   | 1,77±0,72                    | 0,60      |
| Myocardial Infarction N(%)              | 10 (20%)                    | 6 (11%)                      | 0,18      |
| Stroke/Transient Ischemic Attack, N (%) | 5 (10%)                     | 3 (5%)                       | 0,47      |
| Anginal Episodes N (%)                  | 5 (10%)                     | 7 (13%)                      | 0,69      |
| Arrhythmia N (%)                        | 6 (12%)                     | 7 (13%)                      | 0,94      |
| Heart Failure N (%)                     | 11(22%)                     | 8 (13%)                      | 0,19      |
| Peripheral Vascular Disease N (%)       | 2 (4,1%)                    | 5 (9,1)                      | 0,44      |
| History of Neoplasia N (%)              | 8 (16%)                     | 14 (27%)                     | 0,20      |
| Anti-hypertensive Therapy N (%)         | 36 (78%)                    | 40 (76%)                     | 0,74      |
| <b>NYHA class</b>                       |                             |                              |           |
| I N (%)                                 | 16 (35%)                    | 21 (38%)                     | 0,16      |
| II N (%)                                | 11 (24%)                    | 5 (9%)                       |           |
| III-IV N (%)                            | 3 (6%)                      | 2 (4%)                       |           |
| <b>Ambulation</b>                       |                             |                              |           |
| Assisted N, (%)                         | 2 (4,1%)                    | 2 (4,0%)                     | 0,91      |
| Independent N, (%)                      | 47 (46%)                    | 53 (96,0%)                   |           |

## Supplemental Table 4

Multivariate COX regression analysis for the risk of hospitalization (N=126)

|                                    | HR (95% CI, p-value)         |
|------------------------------------|------------------------------|
| <b>Group (exercise vs control)</b> | 0,629 (0,436-0,908), p=0,013 |
| BP Systolic (mmHg)                 | 1,009 (0,999-1,019), p=0,074 |
| Arrhythmia                         | 1,665 (0,959-2,893), p=0,07  |
| Peripheral Vascular Disease        | 1,241 (0,709-2,172), p=0,45  |
| Stroke/Transient Ischemic Attack   | 0,773 (0,428-1,396), p=0,393 |

Multivariate Cox's regression analysis by adherence to the exercise program for the risk of hospitalization.

|                                  | HR (95% CI, p-value)         |
|----------------------------------|------------------------------|
| <b>High Adherence vs Control</b> | 0.472 (0.29-0.767), p=0.002  |
| Low Adherence vs Control         | 0.842 (0.541-1.31), p=0.447  |
| BP Systolic (mmHg)               | 1.009 (0.999-1.019), p=0.062 |
| Arrhythmia                       | 1.747 (1.002-3.048), p=0.049 |
| Peripheral Vascular Disease      | 1.317 (0.749-2.317), p=0.339 |
| Stroke/Transient Ischemic Attack | 0.745 (0.412-1.347), p=0.33  |
